# Supplementary material for: The C-Terminal Domain of RNase H and the C-Terminus Amino Acid Residue Regulate Virus Release and Autoprocessing of a Defective HIV-1 Possessing M50I and V151I Changes in Integrase
Source: MDPI journal article supplement (doi:10.3390/v14122687), 2022-11-30
Supplement: s1 [file s1]

**Supplemental Table S1. DNA sequence of primers for mutagenesis \***

| Primer names | 5'-3'                                        |
|--------------|----------------------------------------------|
| RH:D109N.S   | GGAGGAAATGAACAAGTAAATAAATTGGTCAGTGCTGGAATC   |
| IN:D288G.S   | GTGGCAAGTAGACAGGATGAGGGTTAACACATGGAAAAGATTAG |
| IN:D288N.S   | GTGGCAAGTAGACAGGATGAGAATTAACACATGGAAAAGATTAG |
| IN:D288A.S   | GTGGCAAGTAGACAGGATGAGGCTTAACACATGGAAAAGATTAG |
| IN:D288K.S   | GTGGCAAGTAGACAGGATGAGAAATAACACATGGAAAAGATTAG |
| IN:D288E.S   | GTGGCAAGTAGACAGGATGAGGAGTAACACATGGAAAAGATTAG |
| IN:D288W.S   | GTGGCAAGTAGACAGGATGAGTGGTAACACATGGAAAAGATTAG |
| IN:D288Y.S   | GTGGCAAGTAGACAGGATGAGTATTAACACATGGAAAAGATTAG |
| IN:Del288.S  | GTGGCAAGTAGACAGGATGAGTAGTAACACATGGAAAAGATTAG |
| Delta RH:F   | GGAATCAGGAAAGTACTATTTT TAGATGG               |
| Delta RH:R   | GGCTGCCCCATCTACATAGAAAGTTTCTGC               |
| RH:1-51:R    | GCAATTCATCTAGCTTTGCAGGATTCGGGATTA            |
| RH:1-89:R    | TTCCTTTTTTTATTAAGTCTCTATTATTGACTGAC          |
| RH:1-98:R    | GGAATTGGAGGAAATGAACAAG                       |
| Delta IN     | GCTGGAATCAGGAAAGTACTATTTT TAGATGGAATAGATAAGG |
| Delta CTD    | GCTGGGGAAAGAATAGTAGACTAATAGCAACAGACATAC      |
| Delta 14AA   | CATCAGGGATTATGGATAAACAGATGGCAGGTG            |

\* Sense strand sequence.

**Supplemental Table S2. p values of combination of RH variants with IN:M50I/V151I/D288D**

|                     |                |      | IN:M50I/V151/D288D |               |             |         |         |         |                |
|---------------------|----------------|------|--------------------|---------------|-------------|---------|---------|---------|----------------|
|                     |                | WT   | RH:1-120           | RH:1-120/N79S | $\Delta$ RH | RH:1-51 | RH:1-89 | RH:1-98 | RH:1-120/D109N |
|                     | WT             |      |                    |               |             |         |         |         |                |
| IN:M50I/V151I/D288D | RH:1-120       | **** |                    |               |             |         |         |         |                |
|                     | RH:1-120/N79S  | ns   | **                 |               |             |         |         |         |                |
|                     | $\Delta$ RH    | ns   | **                 | ns            |             |         |         |         |                |
|                     | RH:1-51        | ns   | ***                | ns            | ns          |         |         |         |                |
|                     | RH:1-89        | ns   | **                 | ns            | ns          | ns      |         |         |                |
|                     | RH:1-98        | **   | ns                 | ns            | ns          | ns      | ns      |         |                |
|                     | RH:1-120/D109N | ns   | ****               | *             | *           | ns      | *       | **      |                |

all statistical analyses were conducted by on way ANOVA using Prism 9.

**\*:  $p < 0.05$**

**\*\*:**  $p < 0.01$

\*\*\*:  $p < 0.001$

\*\*\*\*:  $p < 0.00001$

**Supplemental Table S3. Population analysis of Codon 109 of RH in Database**

| LANL |       | Stanford |     | NIAID |     |
|------|-------|----------|-----|-------|-----|
| AA * | % **  | AA       | %   | AA    | %   |
| D    | 99.62 | D        | 100 | D     | 100 |
| F    | 0.02  |          |     |       |     |
| G    | 0.02  |          |     |       |     |
| H    | 0.02  |          |     |       |     |
| N    | 0.21  |          |     |       |     |
| ?    | 0.11  |          |     |       |     |

\*: amino acid sequence at codon 109 of RH.

\*\*: percentage of population of each amino acid in the database

\*\*\*: Single letter code of amino acid; D: Aspartic acid, F: Phenylalanine, G: Glycine, H: Histidine, N: Asparagine, ?: uncharacterized aa

**Supplemental Table S4. p values of combination of IN variants with IN:M50I/V151I \***

|                     |                | IN:M50I/V151I/D288D |       |              |               |       |       |       |       |       |       |                |
|---------------------|----------------|---------------------|-------|--------------|---------------|-------|-------|-------|-------|-------|-------|----------------|
|                     | WT             | $\Delta$ IN         | D288D | $\Delta$ CTD | $\Delta$ 14aa | D288G | D288N | D288K | D288A | D288E | D288Y | $\Delta$ D288D |
| WT                  |                |                     |       |              |               |       |       |       |       |       |       |                |
| $\Delta$ IN         | *              |                     |       |              |               |       |       |       |       |       |       |                |
| IN:M50I/V151I/D288D | D288D          | ****                | *     |              |               |       |       |       |       |       |       |                |
|                     | $\Delta$ CTD   | *                   | ns    | *            |               |       |       |       |       |       |       |                |
|                     | $\Delta$ 14aa  | ns                  | *     | ****         | ns            |       |       |       |       |       |       |                |
|                     | D288G          | ns                  | ns    | ****         | ns            | ns    |       |       |       |       |       |                |
|                     | D288N          | **                  | ns    | *            | ns            | *     | ns    |       |       |       |       |                |
|                     | D288K          | ns                  | **    | ****         | **            | ns    | ns    | **    |       |       |       |                |
|                     | D288A          | ns                  | ns    | ****         | ns            | ns    | ns    | ns    | ns    |       |       |                |
|                     | D288E          | ns                  | ns    | ****         | ns            | ns    | ns    | *     | ns    | ns    |       |                |
|                     | D288Y          | ns                  | ns    | ****         | ns            | ns    | ns    | ns    | ns    | ns    | ns    |                |
|                     | $\Delta$ D288D | ns                  | ns    | ****         | ns            | ns    | ns    | *     | ns    | ns    | ns    |                |

\*: Statistical analysis of virus release was conducted using one way ANOVA,

\*: p<0.05, \*\*:P<0.01, \*\*\*:p<0.001, \*\*\*\*:p<0.0001, ns: not significant, p>0.05

**Supplemental Table S5. Population analysis of amino acid residue at codon 288 of IN**

| AA at 288 | LANL      |        | Sandford |       | NIAID    |       |
|-----------|-----------|--------|----------|-------|----------|-------|
|           | Sequence* | % **   | Sequence | %     | Sequence | %     |
| D **      | 4689      | 93.743 | 20826    | 97.85 | 495      | 96.12 |
| E         | 5         | 0.1    | 4        | 0     | 0        | 0     |
| G         | 5         | 0.1    | 16       | 0.1   | 2        | 0.39  |
| N         | 301       | 6.018  | 208      | 1.9   | 18       | 3.5   |
| S         | 2         | 0.04   | 2        | 0     | 0        | 0     |

\*: Analyzed sequenced number in the database

\*\*: Percentage of each amino acid residue in total analyzed sequences.

\*\*\*: Single letter of amino acid; D: Asparatic acid, E: Glutamic Acid, G: Glycin, N: Asparagine, S: Serine.
